# Supplementary material for: Gut microbiota dependent anti-tumor immunity restricts melanoma growth in Rnf5−/− mice
Source: PubMed Central journal article supplement (PMC6445090; doi:10.1038/s41467-019-09525-y), 2019-04-02
Supplement: 41467_2019_9525_MOESM2_ESM.pdf [file 41467_2019_9525_MOESM2_ESM.pdf]

## Supplementary Information

### Regulation of Gut Microbiota and Anti-Tumor Immunity in *RNF5*<sup>-/-</sup> mice Restricts Melanoma Growth

Li et al.

**A**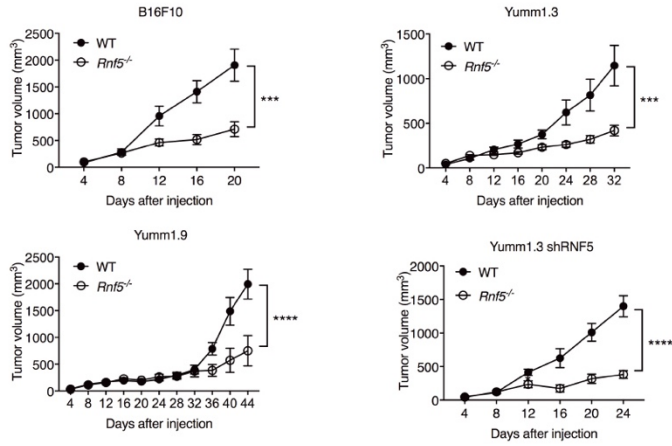**B**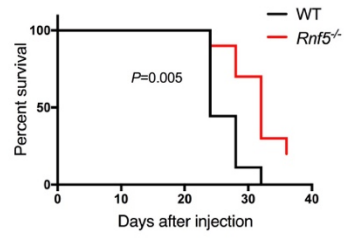**C**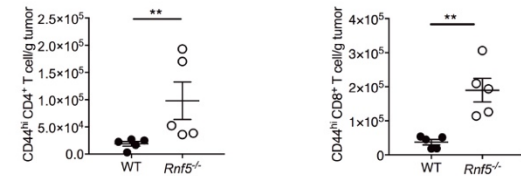**D**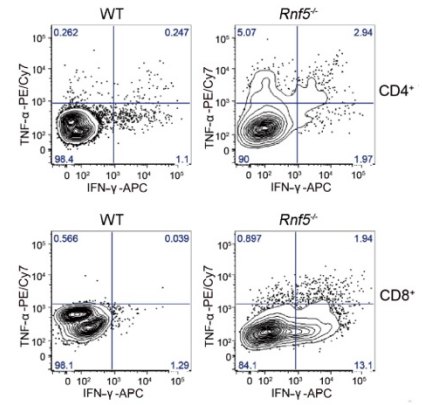**E**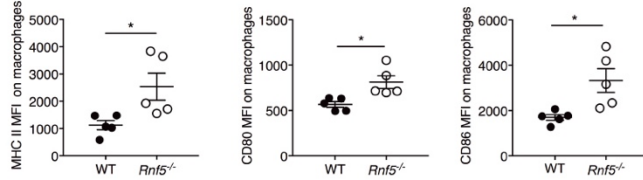**F**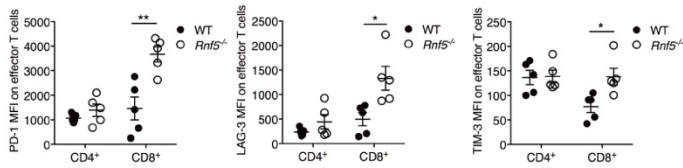**G**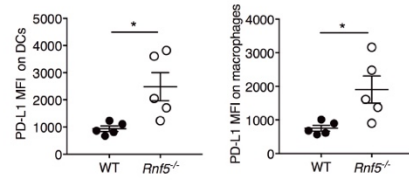**H**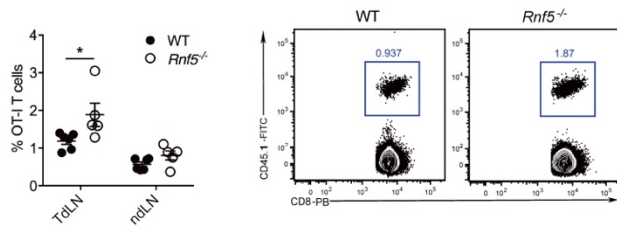**I**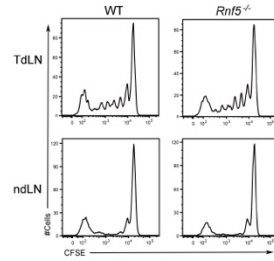**J**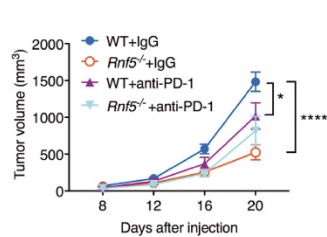**K**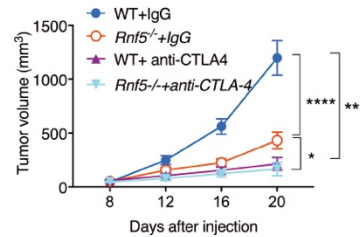

**Supplementary Figure 1.** Enhanced anti-tumor immune responses in *Rnf5*<sup>-/-</sup> mice. **A**, Growth of B16F10, YUMM1.9, YUMM1.3, and YUMM1.3-shRnf5 melanoma cells in WT and *Rnf5*<sup>-/-</sup> mice (*n* = 5). **B**, Survival of WT and *Rnf5*<sup>-/-</sup> mice bearing YUMM1.5 melanoma (WT, *n* = 9; *Rnf5*<sup>-/-</sup>, *n* = 10). Loss of survival was defined as death or when tumor diameter reached or exceeded 2cm in any dimension or the tumor volume reached 2 mm<sup>3</sup>. **C**, Quantification of tumor-infiltrating (CD44<sup>hi</sup>) CD4<sup>+</sup> and CD8<sup>+</sup> T cells on day 16 after injection of 10<sup>6</sup> YUMM1.5 cells into WT and *Rnf5*<sup>-/-</sup> mice (*n* = 5). **D**, Representative flow cytometry plots of cytokine production by tumor-infiltrating CD4<sup>+</sup> and CD8<sup>+</sup> T cells. **E**, MFI of MHC class II, CD80, and CD86 in tumor-infiltrating macrophages on day 24 after injection of YUMM1.5 cells (*n* = 5). **F**, MFI of PD-1, LAG-3, and TIM-3 in tumor-infiltrating (CD44<sup>hi</sup>) CD4<sup>+</sup> and CD8<sup>+</sup> T cells at day 24 after injection of YUMM1.5 cells (*n* = 5). **G**, MFI of PD-L1 in tumor-infiltrating DCs or macrophages on day 24 after injection of YUMM1.5 cells (*n* = 5). **H**, Frequency of CD45.1<sup>+</sup>CD8<sup>+</sup>OT-I T cells from TdLN or ndLN from WT or *Rnf5*<sup>-/-</sup> mice (WT, *n* = 6; *Rnf5*<sup>-/-</sup>, *n* = 5). **I**, Representative FACS profiles showing dilution of CFSE staining in CD45.1<sup>+</sup>CD8<sup>+</sup>WT OT-1 T cells from TdLNs and ndLNs. **J**, Tumor growth after injection of YUMM1.5 cells into WT or *Rnf5*<sup>-/-</sup> mice treated with control IgG or anti-PD-1 antibody (IgG, *n* = 9; anti-PD-1, *n* = 8). **K**, Tumor growth after injection of YUMM1.5 cells into WT or *Rnf5*<sup>-/-</sup> mice treated with control IgG or anti-CTLA-4 blocking antibody (*n* = 9). Data are representative of three independent experiments (**A**, **D-G**), two independent experiments (**C**, **H-J**) and one experiment (**B**, **K**). Graphs show the mean ± s.e.m. \**P* < 0.05, \*\**P* < 0.005, \*\*\**P* < 0.001, \*\*\*\**P* < 0.0001 by two-way ANOVA with Sidak's or Bonferroni's correction (**A**, **J** and **K**) or log-rank test (**B**). Individual mice were analyzed by two-tailed *t*-test or Mann-Whitney *U* test (**C**, **E-H**).

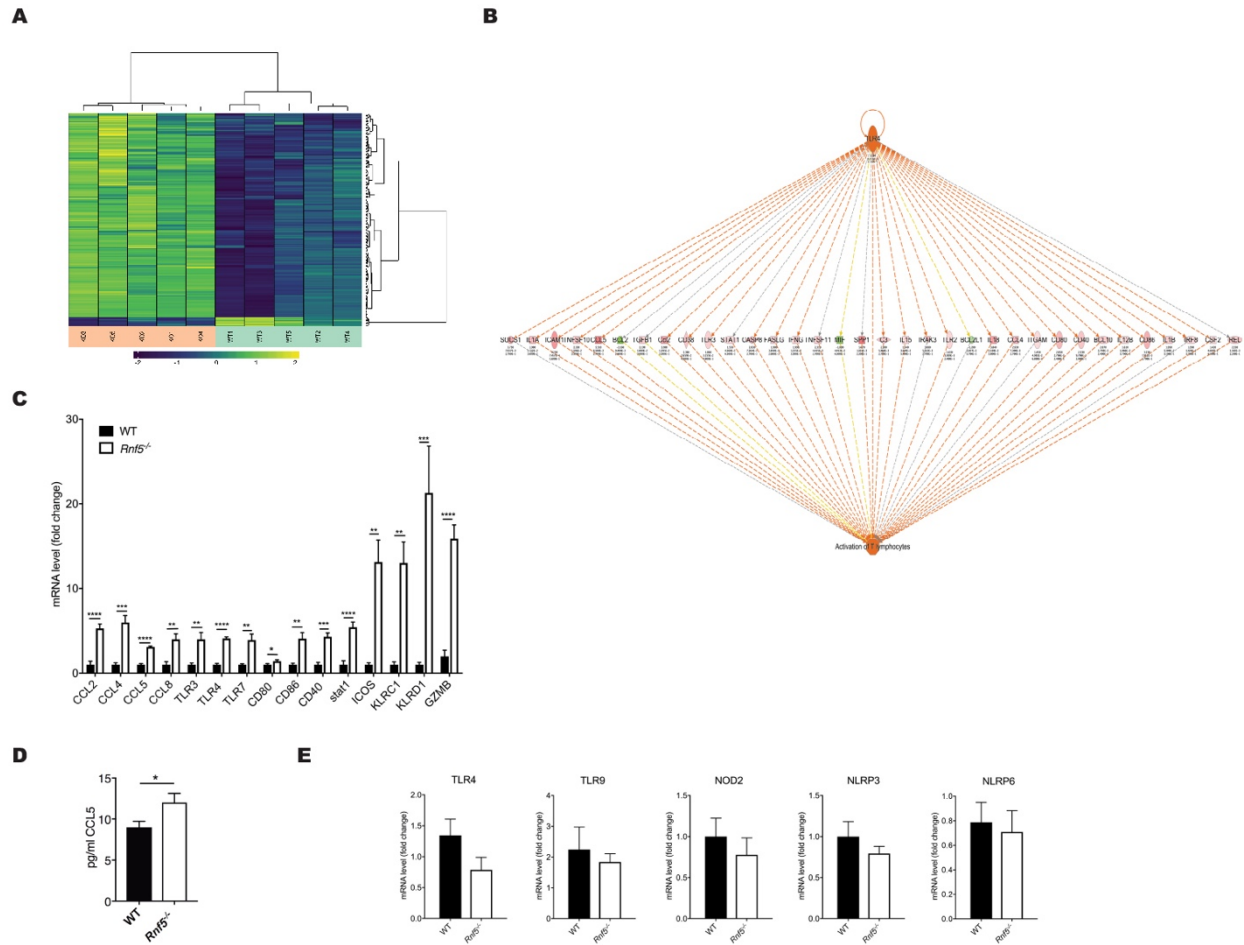

**Supplementary Figure 2.** Enhanced anti-tumor immunoregulatory gene expression in *Rnf5*<sup>-/-</sup> mice. **A**, NanoString analysis of PanCancer Immune Profiling genes in YUMM1.5 melanoma tumors from WT and *Rnf5*<sup>-/-</sup> mice. The heat map shows 403 genes with >1.2-fold difference ( $P \leq 0.05$ ) in expression between the two strains ( $n = 5$ ). **B**, Ingenuity pathway analysis of upstream regulators and effectors in tumors from *Rnf5*<sup>-/-</sup> mice compared with WT mice. **C**, qPCR validation of differentially expressed genes identified by gene expression profiling of tumors from WT and *Rnf5*<sup>-/-</sup> mice ( $n = 5$ ). **D**, CCL5 levels in the serum of WT or *Rnf5*<sup>-/-</sup> mice 10 days after tumor inoculation ( $n = 5$ ). **E**, qRT-PCR analysis of pathogen receptor mRNA levels in IECs from naïve WT or *Rnf5*<sup>-/-</sup> mice ( $n=4$ ). Data are representative of three independent experiments (**C**) and two independent experiments (**D**, **E**). Graphs show the mean  $\pm$  s.e.m. \* $P < 0.05$ , \*\* $P < 0.005$ , \*\*\* $P < 0.001$ , \*\*\*\* $P < 0.0001$  by two-tailed  $t$ -test or Mann–Whitney  $U$  test.

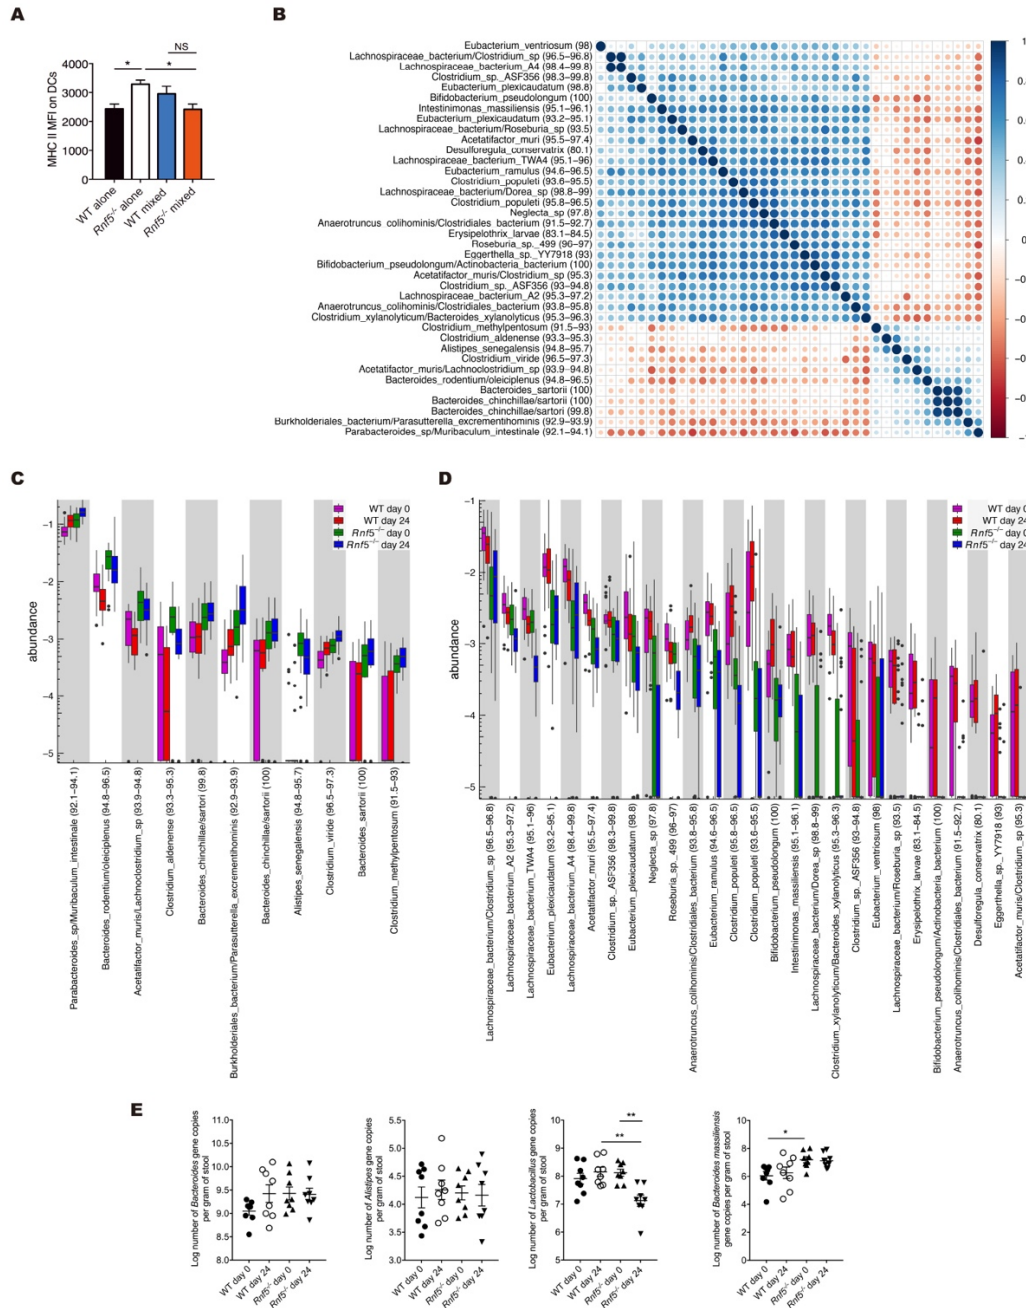

**Supplementary Figure 3.** Marked difference in microbial community structure between *Rnf5*<sup>-/-</sup> and WT mice. **A**, MFI of MHC class II on tumor-infiltrating DCs (CD45<sup>+</sup> CD11c<sup>+</sup>) in tumor-infiltrating effector (CD44<sup>hi</sup>) CD8<sup>+</sup> T cells from WT or *Rnf5*<sup>-/-</sup> mice housed alone or together (mixed) for 4 weeks prior to YUMM1.5 inoculation. Cells were analyzed on day 24 after inoculation ( $n = 10$ ). **B**, Correlation heat map of the relative abundance of the 38 taxa. The color and size of the circles indicate Spearman's correlation and the significance of the correlation, respectively ( $n = 60$ ). **C**, Boxplot of the relative abundance of the 11 taxa enriched in *Rnf5*<sup>-/-</sup> mice microbiota that are negatively correlated with tumor size ( $n = 30$ ). **D**, Boxplot of the relative abundance of the 27 taxa enriched in WT mice microbiota that are positively correlated with tumor size ( $n = 30$ ). **E**, Fecal samples were weighed and DNA were extracted. Quantification of different bacterial copy number in WT and *Rnf5*<sup>-/-</sup> mice were performed on day 0 and day 24 ( $n = 8$ ). Data are representative of two independent experiments (**A**, **E**). Graphs show the mean  $\pm$  s.e.m. \* $P < 0.05$ , \*\* $P < 0.005$ , \*\*\* $P < 0.001$ , \*\*\*\* $P < 0.0001$  by one-way ANOVA with Tukey's correction.

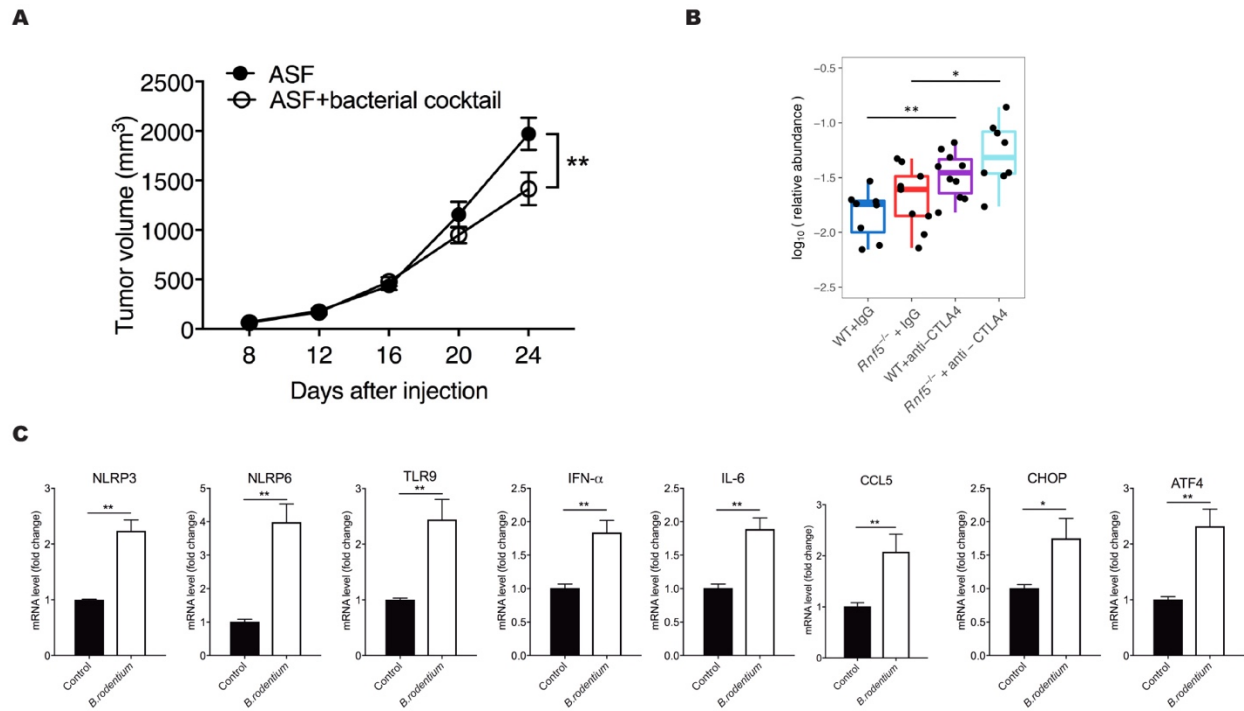

**Supplementary Figure 4.** *B. rodentium* induced ER stress signature and activated components of the TLR signaling pathway. **A**, SW1 tumor growth in ASF-bearing C3H/HeN mice undergoing oral gavage with or without bacterial cocktail prior to tumor inoculation (ASF,  $n = 15$ ; ASF + bacterial cocktail,  $n = 14$ ). **B**, Quantification of *B. rodentium* abundance on day 24 after tumor injection in WT or *Rnf5*<sup>-/-</sup> mice treated with control IgG or anti-CTLA-4 blocking antibody on days 7, 10, 13, and 16 after injection of YUMM1.5 tumor cells ( $n = 9$ ). **C**, qRT-PCR analysis of the indicated ER stress-related and TLR signaling pathway mRNAs in MODE-K cells left untreated (control) or incubated with *B. rodentium* ( $n = 6$ ). Data are representative of three independent experiments (**C**) and one experiment (**A**). Graphs show the mean  $\pm$  s.e.m. \* $P < 0.05$ , \*\* $P < 0.005$ , \*\*\* $P < 0.001$ , \*\*\*\* $P < 0.0001$  by two-tailed  $t$ -test or Mann-Whitney  $U$  test (**C**), one-way ANOVA with Tukey's correction for multiple comparisons (**B**) or two-way ANOVA (**A**).

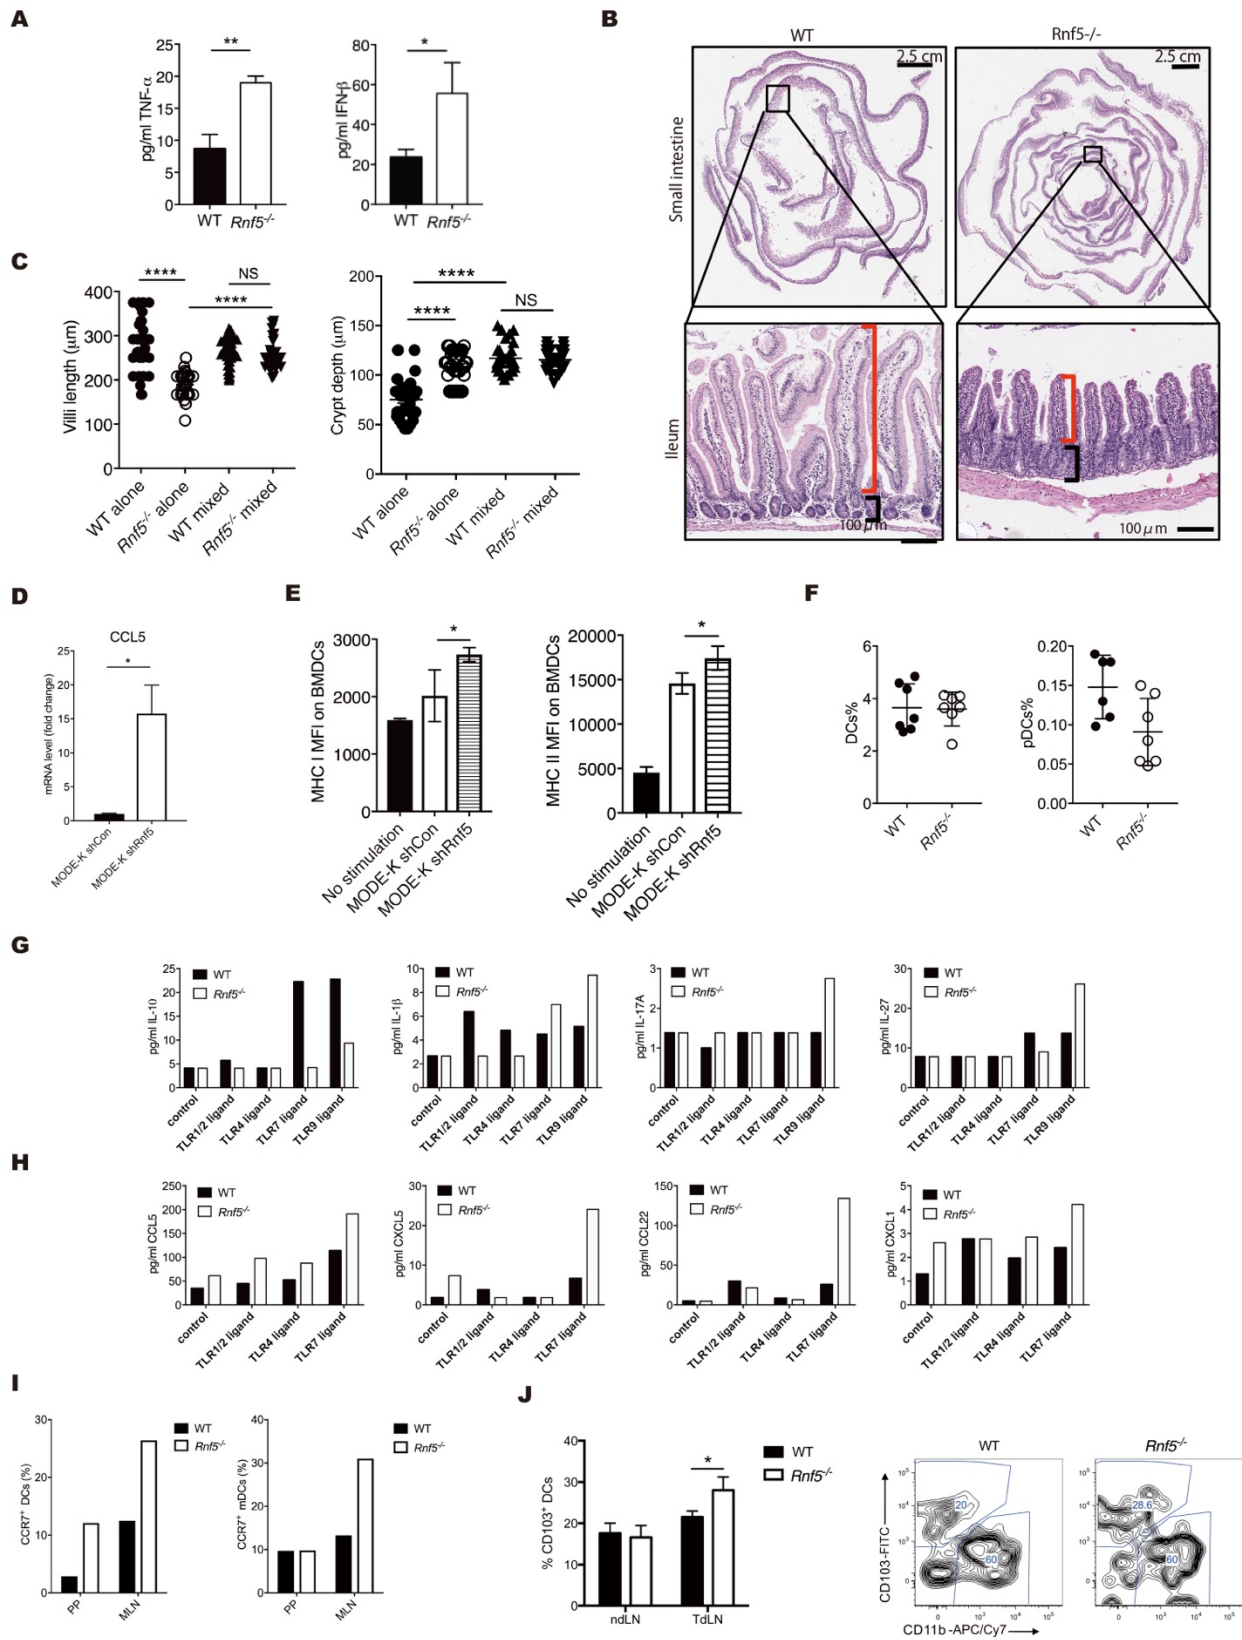

**Supplementary Figure 5.** Altered intrinsic inflammation in *Rnf5*<sup>-/-</sup> mice. **A**, Serum cytokines in naïve WT or *Rnf5*<sup>-/-</sup> mice (*n*=6). **B**, H&E-stained small intestine Swiss roll sections in YUMM1.5 tumor-bearing WT mice or *Rnf5*<sup>-/-</sup> mice (upper panels). Villi length (red bracket) and crypt depth (black bracket) were labeled in the lower panel (scale bar 100µm). **C**, Villi lengths and crypt depth in YUMM1.5 tumor-bearing WT and *Rnf5*<sup>-/-</sup> mice co-housed for 4 weeks prior to tumor inoculation (*n* = 32). **D**, qRT-PCR analysis of CCL5 mRNA levels in MODE-K-shCon and MODE-K-shRnf5 cells (*n* = 3). **E**, MFI of MHC class I and II on bone marrow-derived dendritic cells (BMDCs) incubated with media alone (no stimulation), conditioned media (CM) from shControl or shRNF5 MODE-K cells (*n* = 4). **F**, Percentage of total DCs and pDCs in Peyer's patches isolated from naïve WT or *Rnf5*<sup>-/-</sup> mice (*n* = 6). **G, H**, Average of cytokine and chemokine secretion by FACS-sorted CD45<sup>+</sup> NK1.1<sup>-</sup> CD19<sup>-</sup> Thy1.2<sup>-</sup> CD11c<sup>+</sup> DCs isolated from Peyer's patches from naïve (WT) and *Rnf5*<sup>-/-</sup> mice (pooled from *n* = 10/group). Cells were cultured with or without ligands for TLR1/2 (Pam3CSK4, 300 ng/ml), TLR4 (LPS, 1 µg/ml), TLR7 (R848, 10 µg/ml), and TLR9 (ODN1826, 5 µM) for 18 h, and the supernatants were removed for quantification of cytokines (**G**) and chemokines (**H**). **I**, 10 days after tumor injection, DCs from PP and MLN were isolated and pooled per group (*n*=10 mice/group). Frequency of CCR7<sup>+</sup> DCs and mDCs were detected. **J**, Frequency of CD103<sup>+</sup> DCs from TdLN and ndLN from WT and *Rnf5*<sup>-/-</sup> mice. Dot plots show gating CD103<sup>+</sup>CD11c<sup>+</sup>MHC II<sup>high</sup> cells (*n*=10). Data are representative of three independent experiments (**D, E**) and two independent experiments (**A-C, F-J**). Graphs show the mean ± s.e.m. \*P < 0.05, \*\*P < 0.005, \*\*\*P < 0.001, \*\*\*\*P < 0.0001 by two-tailed t-test or Mann-Whitney U test (**A, D, F, I and J**) or one-way ANOVA with Tukey's correction for multiple comparisons (**C and E**).



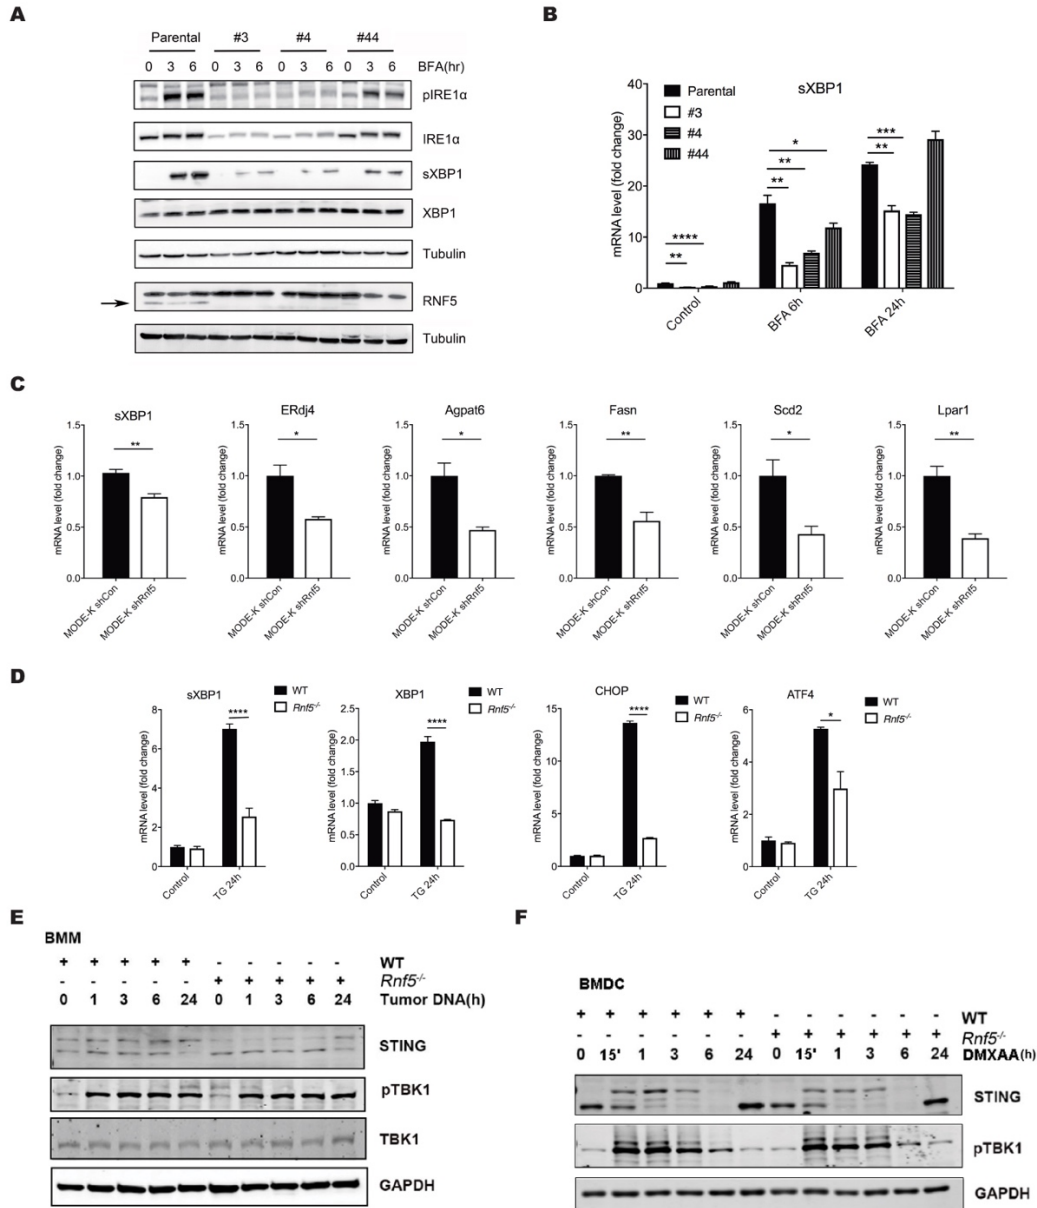

**Supplementary Figure 6.** Altered UPR in *Rnf5*<sup>-/-</sup> mice induce concerted changes in the gut microbiome and immune response. **A**, Western blot analysis of the indicated proteins in lysates of YUMM1.7 melanoma cells treated with 3 $\mu$ M BFA for indicated time. Parental, homozygote *Rnf5*<sup>-/-</sup> (two independent clones, #3 and #4), and a heterozygote *Rnf5*<sup>+/-</sup> clone (#44) are shown. **B**, qRT-PCR analysis of sXBP1 mRNA in the cells shown in (a) treated with 3 $\mu$ M BFA for indicated time. **C**, qRT-PCR analysis of mRNA levels of sXBP1, ERdj4, and indicated triglyceride-related genes in MODE-K cells expressing control or RNF5-specific shRNA. **D**, RT-PCR analysis of indicated ER stress-related mRNAs in bone marrow-derived macrophages (BMDMs) from WT and *Rnf5*<sup>-/-</sup> mice after treatment *in vitro* with or without 1 $\mu$ M thapsigargin (TG) for indicated times ( $n = 4$ ). **E**, Western blot analysis of the indicated proteins in lysates of BMM treated with tumor DNA for indicated times ( $n = 3$ ). **F**, As in panel E, except that BMDC were treated with DMXAA for indicated times ( $n = 3$ ). Data are representative of three independent experiments (B, C, D) and two independent experiments (A, E, F). Graphs show the mean  $\pm$  s.e.m. \* $P < 0.05$ , \*\* $P < 0.005$ , \*\*\* $P < 0.001$ , \*\*\*\* $P < 0.0001$  by two-tailed  $t$ -test or Mann–Whitney  $U$  test (C–D) or one-way ANOVA with Tukey's correction for multiple comparisons (B).

**A**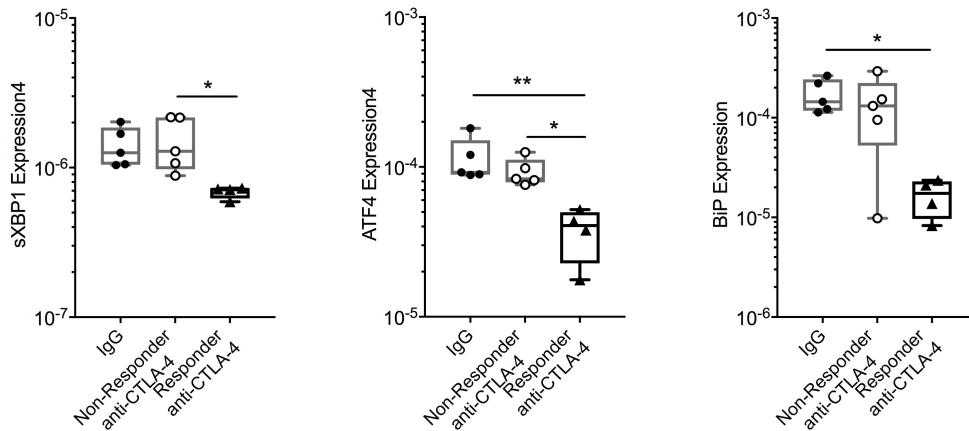**B**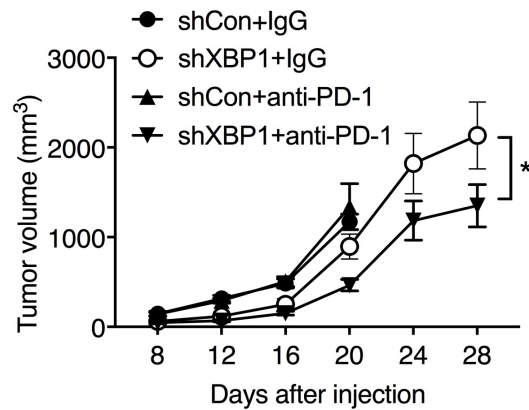

**Supplementary Figure 7.** Reduced expression of UPR components in murine melanoma responders to anti-CTLA4 treatment. **A**, RT-PCR analysis of indicated UPR-related mRNAs of B2905 melanomas collected from the mice treated with isotype or anti-CTLA4 antibodies (IgG, Non-Responder anti-CTLA4,  $n = 5$ ; Responder anti-CTLA4,  $n = 4$ ). **B**, Tumor growth after s.c. injection of YUMM1.7-shCon and YUMM1.7-shXBP1 cells into C57BL/6 mice treated with control IgG or anti-PD-1 antibody on days 7, 10, 13, and 16 after tumor inoculation ( $n = 8$ ). Data are representative of two independent experiments (**B**) and one experiment (**A**). Graphs show the mean  $\pm$  s.e.m. \* $P < 0.05$ , \*\* $P < 0.005$  by one-way ANOVA (**A**) or two-way ANOVA (**B**) with Tukey's correction for multiple comparisons.

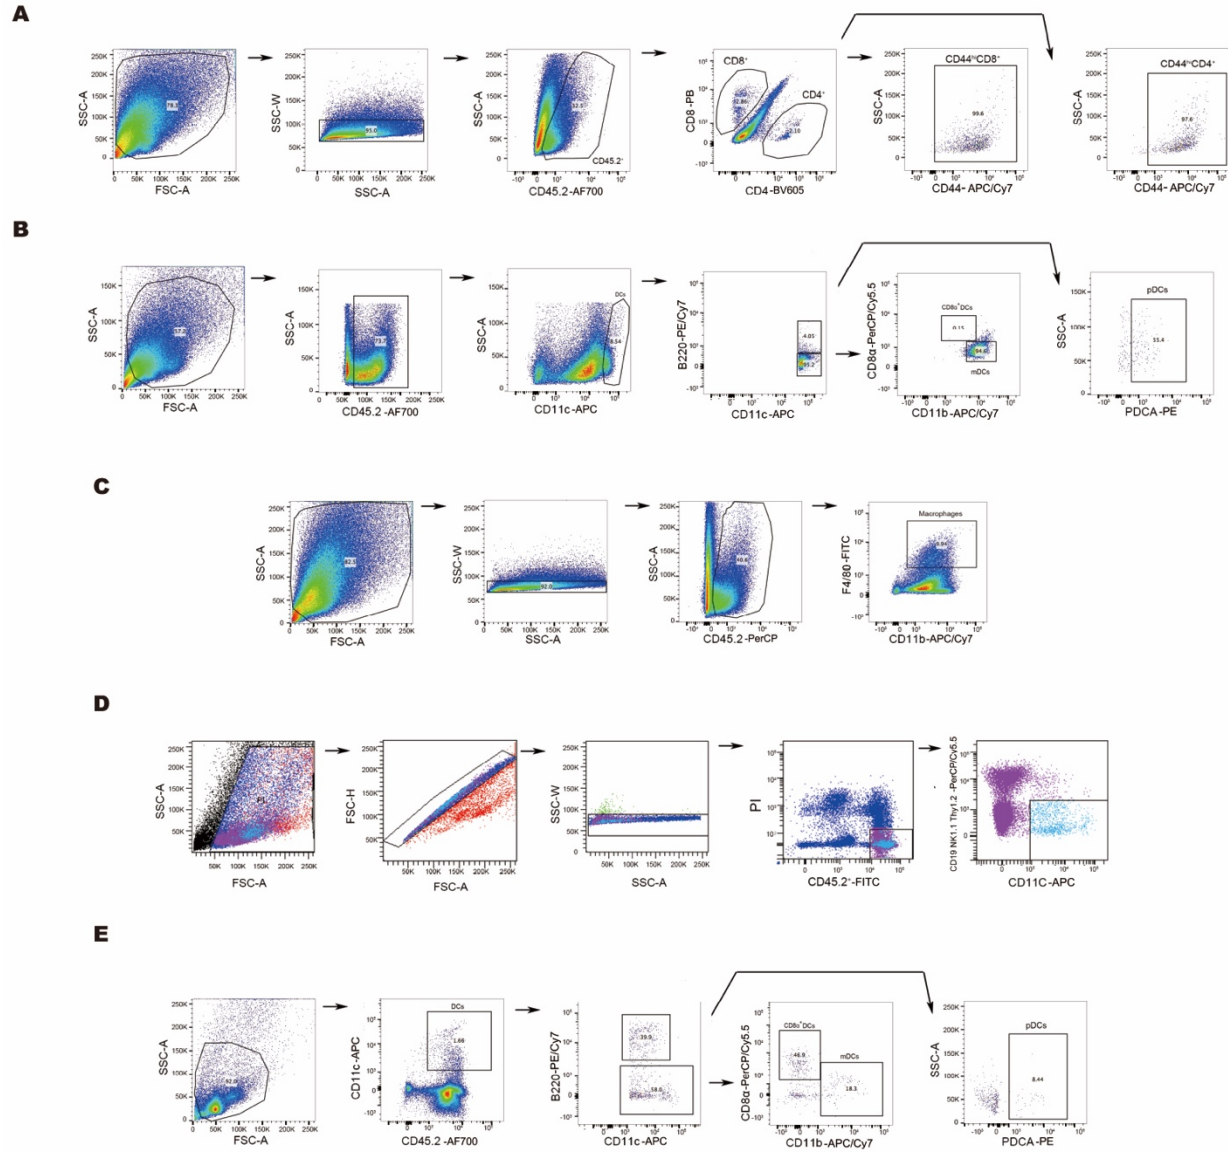

**Supplementary Figure 8.** Gating strategies for immune cells analysis and cell sorting. **A**, Gating strategy of the tumor infiltrating CD45<sup>+</sup>, CD44<sup>high</sup>CD4<sup>+</sup> and CD44<sup>high</sup>CD8<sup>+</sup> T cells presented on Figure 1B, 1C, 3E, 4B, 4D, 4F, and Supplementary Figure 1C and 1F. **B**, Gating strategy of the tumor infiltrating DCs (CD45.2<sup>+</sup>CD11c<sup>+</sup>), mDCs (CD45.2<sup>+</sup>CD11c<sup>+</sup>B220<sup>-</sup>CD8α<sup>-</sup>CD11b<sup>+</sup>), pDCs (CD45.2<sup>+</sup>CD11c<sup>int</sup>B220<sup>+</sup>PDCA<sup>+</sup>) and CD8α<sup>+</sup>DCs (CD45.2<sup>+</sup>CD11c<sup>+</sup>B220<sup>-</sup>CD8α<sup>+</sup>CD11b<sup>-</sup>) presented on Figure 1D, 1E, 3F and Supplementary Figure 1G, as described before<sup>1</sup>. **C**, Gating strategy of the tumor infiltrating macrophages (CD45<sup>+</sup>F4/80<sup>+</sup>CD11b<sup>+</sup>) presented on Supplementary Figure 1E. **D**, Gating strategy of sorted DCs (CD45<sup>+</sup>CD11c<sup>+</sup>NK1.1<sup>-</sup>CD19<sup>-</sup>Thy1.2<sup>-</sup>) from PPs presented on Figure 5G, and Supplementary Figure 5G, 5H and 5I. **E**, Gating strategy of the tumor infiltrating DCs, mDCs, pDCs and CD8α<sup>+</sup>DCs from PPs presented on Figure 5F and Supplementary Figure 5F.

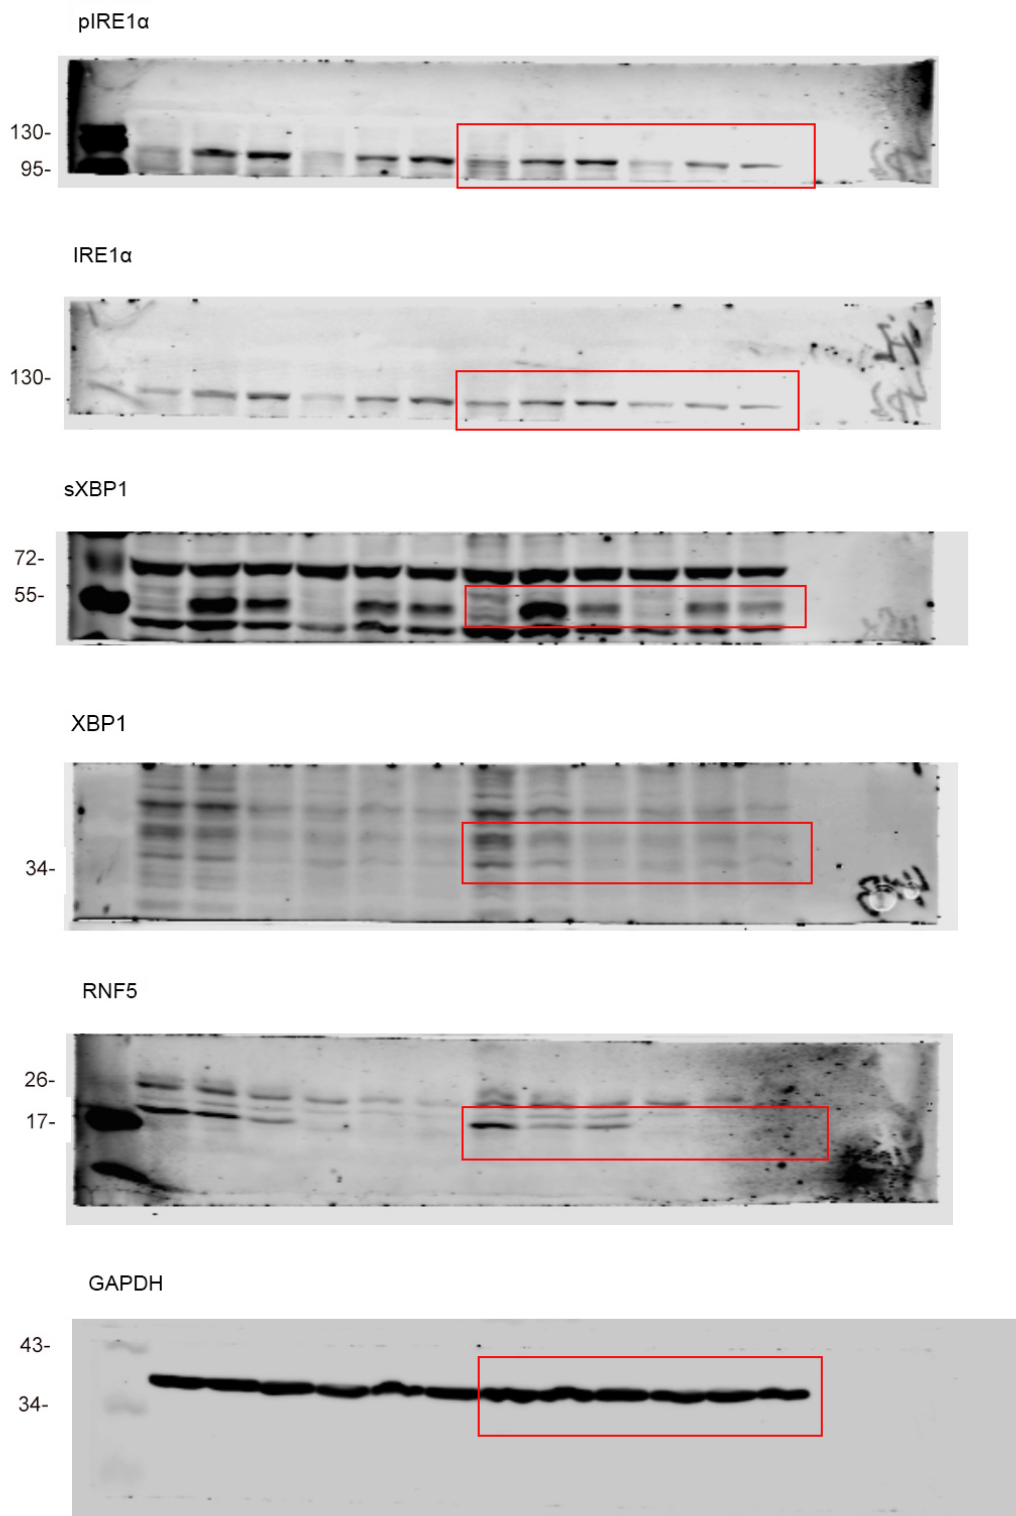

**Supplementary Figure 9.** raw data for Figure 6A

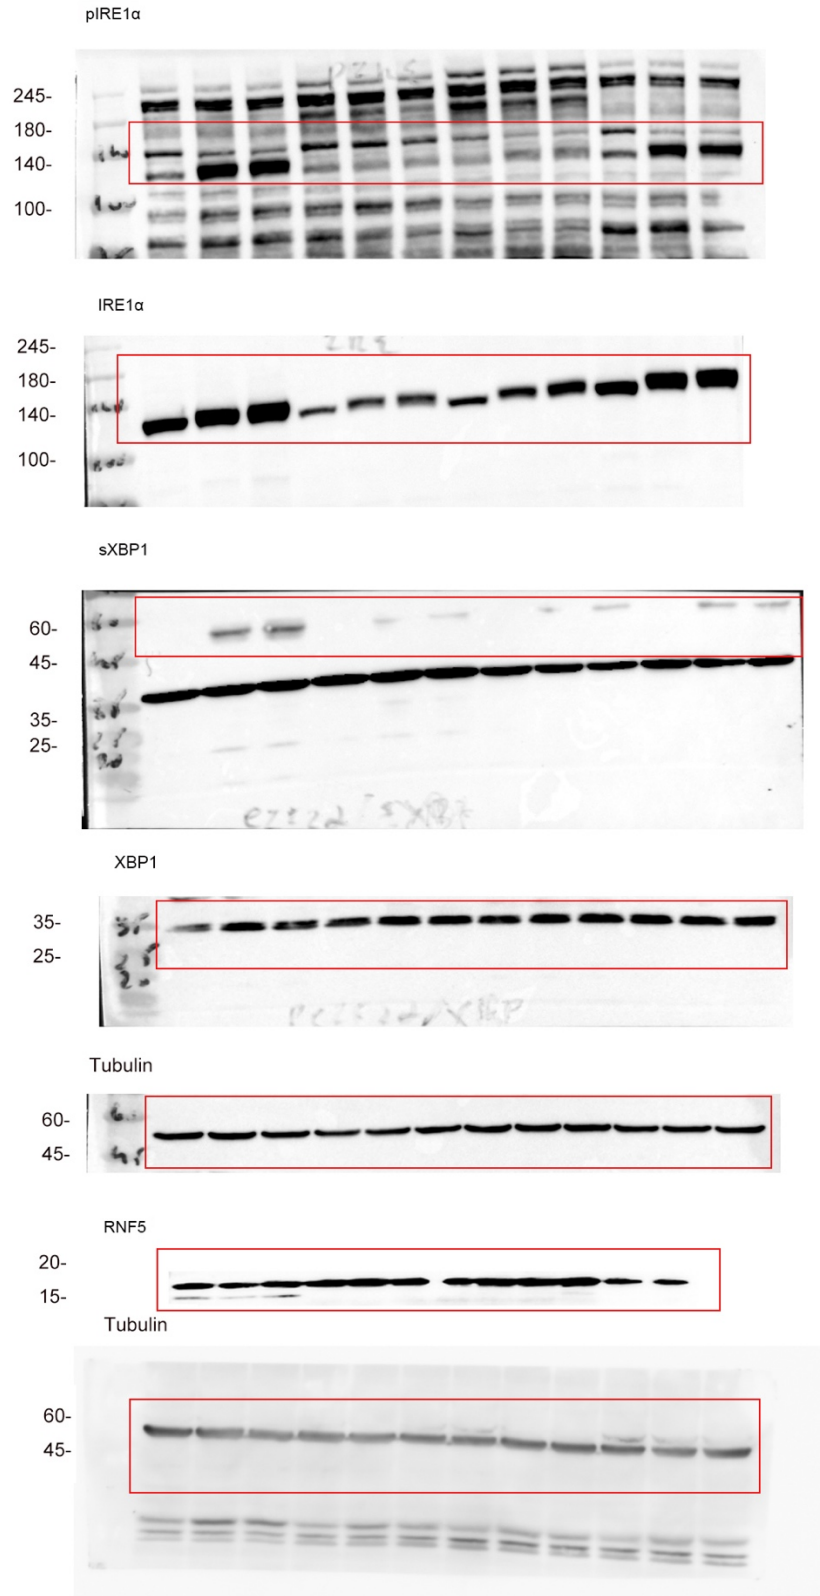

**Supplementary Figure 9.** raw data for Supplementary Figure 6A

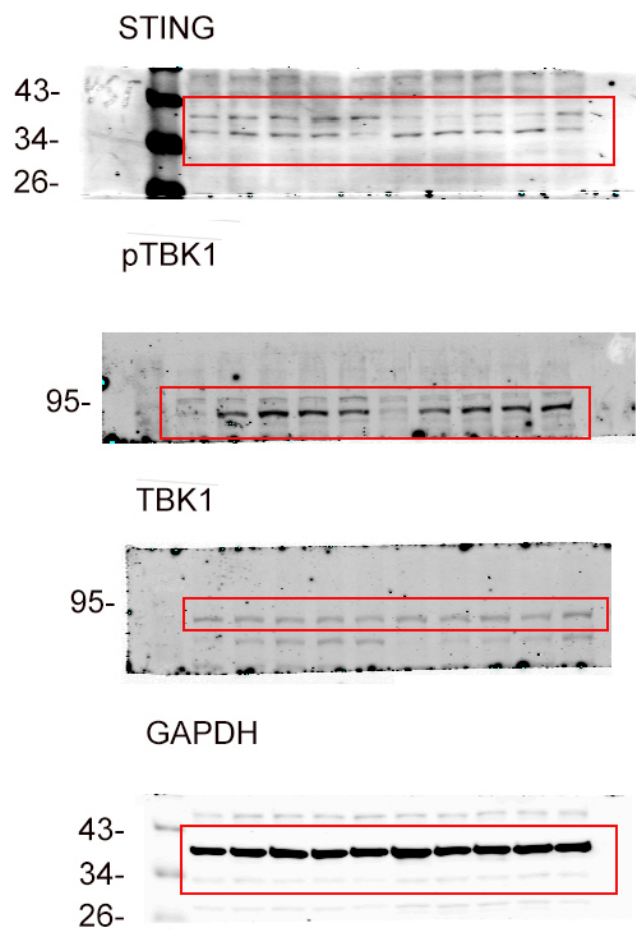

**Supplementary Figure 9.** raw data for Supplementary Figure 6E

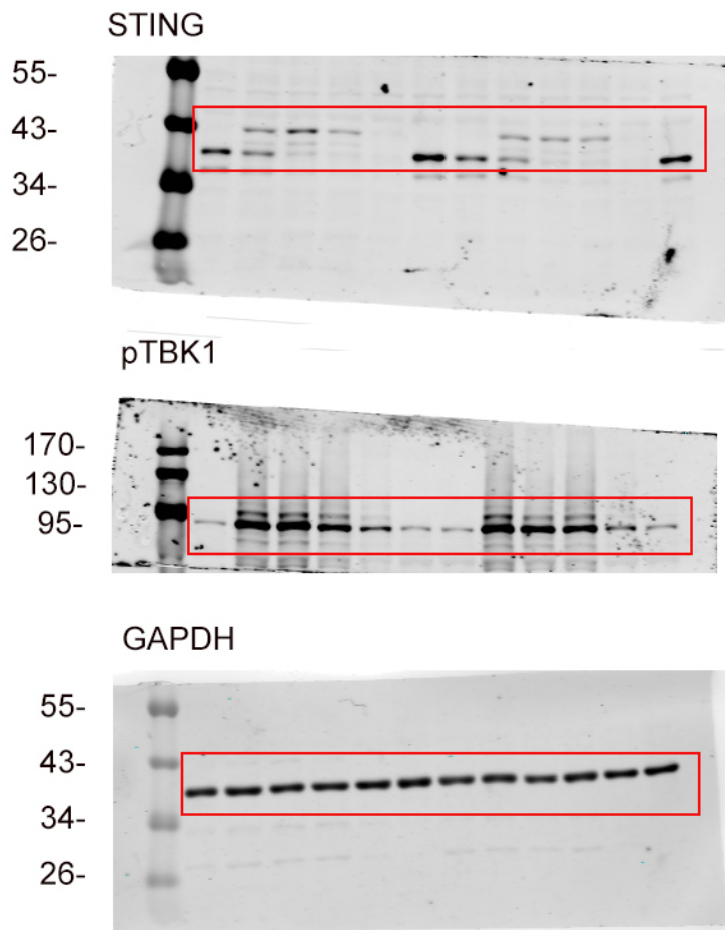

**Supplementary Figure 9.** raw data for Supplementary Figure 6F

**Supplementary Table 1.** Bacterial groups that distinguish gut microbiota of WT from *Rnf5*<sup>-/-</sup> mice. Phylotypes were selected based on abundance and correlation with tumor size at day 24, using Welch *t*-test and Wilcoxon rank-sum test. Benjamini-Hochberg adjusted p-value are less than 0.05.

| OSU Group ID | Name                                                                   | Correlation with tumor volume | Correlation p-value | log10 median of WT day 0 | log10 median of WT day 24 | log10 median of KO day 0 | log10 median of KO day 24 | OSU IDs in the group                                                                                                                                                                                                                                                                                                                                                                                                                                                                                                                                                                                                                                                                                                                                                                                                                                                                                                                                                                                                                                                                                                                                                                                                                                                                                                                                                                                                                                                                                                                                                                                                                                                                                                                                                                                                                                                                                                                                                                                                                                                                                                                                                                                                                                                                                                                                                                                                                                                                                                                                                                                                                                                                                                                                                                                                                                                                                                                                                                                                                                                                                                                                                                                                                                                                                                                                                                                                                                                                                                                                                                                                                                                                                                                                                                                                                                                                                                                                                                                                                           | Mapped Strains                                                                                        |
|--------------|------------------------------------------------------------------------|-------------------------------|---------------------|--------------------------|---------------------------|--------------------------|---------------------------|------------------------------------------------------------------------------------------------------------------------------------------------------------------------------------------------------------------------------------------------------------------------------------------------------------------------------------------------------------------------------------------------------------------------------------------------------------------------------------------------------------------------------------------------------------------------------------------------------------------------------------------------------------------------------------------------------------------------------------------------------------------------------------------------------------------------------------------------------------------------------------------------------------------------------------------------------------------------------------------------------------------------------------------------------------------------------------------------------------------------------------------------------------------------------------------------------------------------------------------------------------------------------------------------------------------------------------------------------------------------------------------------------------------------------------------------------------------------------------------------------------------------------------------------------------------------------------------------------------------------------------------------------------------------------------------------------------------------------------------------------------------------------------------------------------------------------------------------------------------------------------------------------------------------------------------------------------------------------------------------------------------------------------------------------------------------------------------------------------------------------------------------------------------------------------------------------------------------------------------------------------------------------------------------------------------------------------------------------------------------------------------------------------------------------------------------------------------------------------------------------------------------------------------------------------------------------------------------------------------------------------------------------------------------------------------------------------------------------------------------------------------------------------------------------------------------------------------------------------------------------------------------------------------------------------------------------------------------------------------------------------------------------------------------------------------------------------------------------------------------------------------------------------------------------------------------------------------------------------------------------------------------------------------------------------------------------------------------------------------------------------------------------------------------------------------------------------------------------------------------------------------------------------------------------------------------------------------------------------------------------------------------------------------------------------------------------------------------------------------------------------------------------------------------------------------------------------------------------------------------------------------------------------------------------------------------------------------------------------------------------------------------------------------------|-------------------------------------------------------------------------------------------------------|
| 216          | Burkholderiales_bacterium/Parasutterella_excrementihominis (92.9-93.9) | -0.51                         | 2.7E-05             | -3.41                    | -3.13                     | -2.79                    | -2.49                     | 1009135; 1000742; 1000080                                                                                                                                                                                                                                                                                                                                                                                                                                                                                                                                                                                                                                                                                                                                                                                                                                                                                                                                                                                                                                                                                                                                                                                                                                                                                                                                                                                                                                                                                                                                                                                                                                                                                                                                                                                                                                                                                                                                                                                                                                                                                                                                                                                                                                                                                                                                                                                                                                                                                                                                                                                                                                                                                                                                                                                                                                                                                                                                                                                                                                                                                                                                                                                                                                                                                                                                                                                                                                                                                                                                                                                                                                                                                                                                                                                                                                                                                                                                                                                                                      | Burkholderiales_bacterium_1_1_47,Parasutterella_excrementihominis_YIT_11859                           |
| 9            | Parabacteroides_sp/Muribaculum_intestinale (92.1-94.1)                 | -0.49                         | 7.1E-05             | -1.14                    | -0.94                     | -0.93                    | -0.79                     | 1004421; 1001550; 1004658; 1007767; 1003515; 1004049; 1009144; 1003893; 1006312; 1002599; 1007466; 1005198; 1003018; 1007913; 1004531; 1003752; 1009332; 1009811; 1008401; 1003032; 1003605; 1004160; 1008447; 1001920; 1001986; 1004579; 1003800; 1001605; 1003821; 1005883; 1005625; 1008098; 1001284; 1007277; 1011959; 1003341; 1007300; 1001166; 1001141; 1010942; 1003513; 1000850; 1003877; 1005710; 1007806; 1005732; 1004093; 1009695; 1009303; 1003027; 1006748; 1002284; 1006800; 1009392; 1002197; 1003310; 1005624; 1005887; 1003833; 1000739; 1003858; 1003724; 1004122; 1003984; 1009015; 1006186; 1004832; 1006644; 1000007; 1000045; 1000172; 1000058; 1005111; 1000362; 1008686; 1001510; 1006971; 1005975; 1009177; 1007410; 1006784; 1005028; 1001006; 1006513; 1008127; 1000167; 1001394; 1004772; 1007584; 1005574; 1005845; 1001365; 1009431; 1002162; 1003346; 1007323; 1004233; 1003666; 1001745; 1002324; 1005954; 1006259; 1005715; 1004070; 1001191; 1005452; 1001427; 1005171; 1005176; 1003260; 1005189; 1004950; 1003013; 1006053; 1005783; 1004135; 1009333; 1007123; 1006804; 1002739; 1001542; 1009005; 1004394; 1002749; 1001998; 1005092; 1002876; 1006250; 1003091; 1001186; 1011385; 1005417; 1006651; 1006000; 1006055; 1005492; 1002356; 1008956; 1009903; 1011682; 1003381; 1009697; 1003016; 1005010; 1006459; 1008538; 1005059; 1000037; 1000146; 1005920; 1009179; 1001448; 1011818; 1003283; 1011508; 1004354; 1001781; 1009907; 1006830; 1004182; 1003110; 1008785; 1004741; 1002727; 1007580; 1007586; 1002455; 1005055; 1001323; 1009862; 1008128; 1003657; 1000891; 1006927; 1005385; 1007328; 1002978; 1003662; 1009141; 1001485; 1004263; 1005143; 1006653; 1006309; 1002166; 1007064; 1001533; 1003417; 1007091; 1004333; 1009337; 1007552; 1006113; 1011166; 1008000; 1006125; 1003474; 1001218; 1002853; 1007262; 1004403; 1010486; 1002765; 1003852; 1006936; 1005945; 1002390; 1005966; 1004072; 1002410; 1002339; 1008287; 1002603; 1007488; 1008359; 1010248; 1006740; 1002362; 1002290; 1006527; 1005096; 1008153; 1007562; 1009905; 1011625; 1009542; 1007048; 1000094; 1007745; 1007435; 1004708; 1007502; 1009369; 1003461; 1005577; 1009445; 1006546; 1006941; 1000497; 1007574; 1010788; 1009511; 1000928; 1010121; 1002209; 1002381; 1003696; 1005446; 1001192; 1002797; 1008810; 1002029; 1008821; 1006072; 1001406; 1002271; 1000902; 1006423; 1010729; 1002829; 1005290; 1002647; 1002741; 1010435; 1004017; 1005095; 1003508; 1004924; 1009247; 1006392; 1011104; 1007525; 1003431; 1003035; 1001829; 1001885; 1004560; 1006453; 1010877; 1007707; 1003861; 1002943; 1004964; 1001198; 1005809; 1006786; 1005264; 1007229; 1008532; 1007244; 1010903; 1008145; 1000018; 1006608; 1000846; 1001064; 1009395; 1007443; 1008055; 1007751; 1008689; 1007439; 1004096; 1003408; 1001104; 1005496; 1001132; 1005513; 1010789; 1003983; 1001784; 1001647; 1007675; 1010489; 1005402; 1003676; 1009184; 1002086; 1005536; 1004145; 1009861; 1001921; 1000975; 1008267; 1007038; 1003920; 1001638; 1002814; 1008824; 1007909; 1002825; 1010325; 1008033; 1000332; 1000338; 1002691; 1004692; 1008799; 1007962; 1000025; 1001857; 1007434; 1001260; 1003674; 1011381; 1003557; 1002808; 1004117; 1002515; 1001381; 1008869; 1010721; 1006436; 1000962; 1008054; 1011254; 1005048; 1002754; 1008615; 1004656; 1003867; 1002344; 1008817; 1002188; 1004552; 1005268; 1009404; 1003198; 1002038; 1005739; 1010280; 1002442; 1000004; 1000019; 1000034; 1001222; 1000648; 1011056; 1001435; 1004942; 1005917; 1001591; 1002494; 1004530; 1007994; 1008026; 1003064; 1009487; 1008203; 1006963; 1003882; 1003905; 1008402; 1004767; 1007045; 1001402; 1002429; 1009856; 1010785; 1011596; 1009460; 1000026; 1005419; 1009554; 1007391; 1002360; 1005682; 1004881; 1009148; 1003002; 1002088; 1010663; 1001322; 1002549; 1011298; 1011671; 1000753; 1000673; 1004702; 1002540; 1003313; 1001503; 1011930; 1009188; 1009830; 1009679; 1001532; 1004249; 1001134; 1011565; 1008580; 1005338 | Parabacteroides_sp._YL27,Muribaculum_intestinale_YL27                                                 |
| 387          | Clostridium_aldenense (93.3-95.3)                                      | -0.44                         | 3.9E-04             | -3.27                    | -4.27                     | -2.62                    | -3.08                     | 1008904; 1002719; 1000140                                                                                                                                                                                                                                                                                                                                                                                                                                                                                                                                                                                                                                                                                                                                                                                                                                                                                                                                                                                                                                                                                                                                                                                                                                                                                                                                                                                                                                                                                                                                                                                                                                                                                                                                                                                                                                                                                                                                                                                                                                                                                                                                                                                                                                                                                                                                                                                                                                                                                                                                                                                                                                                                                                                                                                                                                                                                                                                                                                                                                                                                                                                                                                                                                                                                                                                                                                                                                                                                                                                                                                                                                                                                                                                                                                                                                                                                                                                                                                                                                      | Clostridium_aldenense_RMA_9741                                                                        |
| 259          | Acetatifactor_muris/Lachnoclostridium_sp (93.9-94.8)                   | -0.44                         | 4.0E-04             | -2.65                    | -2.93                     | -2.36                    | -2.49                     | 1005946; 1000068                                                                                                                                                                                                                                                                                                                                                                                                                                                                                                                                                                                                                                                                                                                                                                                                                                                                                                                                                                                                                                                                                                                                                                                                                                                                                                                                                                                                                                                                                                                                                                                                                                                                                                                                                                                                                                                                                                                                                                                                                                                                                                                                                                                                                                                                                                                                                                                                                                                                                                                                                                                                                                                                                                                                                                                                                                                                                                                                                                                                                                                                                                                                                                                                                                                                                                                                                                                                                                                                                                                                                                                                                                                                                                                                                                                                                                                                                                                                                                                                                               | Lachnoclostridium_sp._An196,Acetatifactor_muris,Acetatifactor_muris_CT-m2                             |
| 644          | Alistipes_senegalensis (94.8-95.7)                                     | -0.43                         | 5.4E-04             | -5.13                    | -5.13                     | -3.08                    | -3.32                     | 1005340; 1003482; 1000382; 1000393; 1007761; 1009052                                                                                                                                                                                                                                                                                                                                                                                                                                                                                                                                                                                                                                                                                                                                                                                                                                                                                                                                                                                                                                                                                                                                                                                                                                                                                                                                                                                                                                                                                                                                                                                                                                                                                                                                                                                                                                                                                                                                                                                                                                                                                                                                                                                                                                                                                                                                                                                                                                                                                                                                                                                                                                                                                                                                                                                                                                                                                                                                                                                                                                                                                                                                                                                                                                                                                                                                                                                                                                                                                                                                                                                                                                                                                                                                                                                                                                                                                                                                                                                           | Alistipes_senegalensis_JC50                                                                           |
| 25           | Bacteroides_rodentium/oleiciplenus (94.8-96.5)                         | -0.40                         | 1.4E-03             | -2.09                    | -2.34                     | -1.56                    | -1.80                     | 1009749; 1009283; 1008819; 1000248; 1000727; 1000847; 1000531; 1002183; 1000012                                                                                                                                                                                                                                                                                                                                                                                                                                                                                                                                                                                                                                                                                                                                                                                                                                                                                                                                                                                                                                                                                                                                                                                                                                                                                                                                                                                                                                                                                                                                                                                                                                                                                                                                                                                                                                                                                                                                                                                                                                                                                                                                                                                                                                                                                                                                                                                                                                                                                                                                                                                                                                                                                                                                                                                                                                                                                                                                                                                                                                                                                                                                                                                                                                                                                                                                                                                                                                                                                                                                                                                                                                                                                                                                                                                                                                                                                                                                                                | Bacteroides_oleiciplenus_YIT_12058,Bacteroides_oleiciplenus_JCM_16102,Bacteroides_rodentium_JCM_16496 |
| 250          | Bacteroides_sartorii (100)                                             | -0.35                         | 6.9E-03             | -5.12                    | -3.61                     | -3.29                    | -3.21                     | 7357                                                                                                                                                                                                                                                                                                                                                                                                                                                                                                                                                                                                                                                                                                                                                                                                                                                                                                                                                                                                                                                                                                                                                                                                                                                                                                                                                                                                                                                                                                                                                                                                                                                                                                                                                                                                                                                                                                                                                                                                                                                                                                                                                                                                                                                                                                                                                                                                                                                                                                                                                                                                                                                                                                                                                                                                                                                                                                                                                                                                                                                                                                                                                                                                                                                                                                                                                                                                                                                                                                                                                                                                                                                                                                                                                                                                                                                                                                                                                                                                                                           | Bacteroides_sartorii_JCM_17136                                                                        |



|     |                                                                      |       |         |       |       |       |       |                                                                                                                                                                                                                                                                                       |                                                                                                                                                                                                                                                                                                                  |
|-----|----------------------------------------------------------------------|-------|---------|-------|-------|-------|-------|---------------------------------------------------------------------------------------------------------------------------------------------------------------------------------------------------------------------------------------------------------------------------------------|------------------------------------------------------------------------------------------------------------------------------------------------------------------------------------------------------------------------------------------------------------------------------------------------------------------|
| 622 | <i>Clostridium_methylpentosum</i> (91.5-93)                          | -0.34 | 8.6E-03 | -5.13 | -5.12 | -3.43 | -3.30 | 1001716; 1005298; 1000813; 1001067; 1011691; 1000355                                                                                                                                                                                                                                  | <i>Clostridium_methylpentosum</i> _DSM_5476, <i>Clostridium_methylpentosum</i> _R2                                                                                                                                                                                                                               |
| 275 | <i>Clostridium_viride</i> (96.5-97.3)                                | -0.33 | 9.2E-03 | -3.36 | -3.16 | -3.11 | -2.95 | 1000526; 1000236                                                                                                                                                                                                                                                                      | <i>Clostridium_viride</i> _DSM_6836                                                                                                                                                                                                                                                                              |
| 105 | <i>Bacteroides_chinchillae/sartorii</i> (100)                        | -0.33 | 9.6E-03 | -3.20 | -3.24 | -2.89 | -2.90 | 7358                                                                                                                                                                                                                                                                                  | <i>Bacteroides_chinchillae</i> _JCM_16497, <i>Bacteroides_sartorii</i> _A-C2-0, <i>Bacteroides_sartorii</i> _JCM_16497                                                                                                                                                                                           |
| 70  | <i>Bacteroides_chinchillae/sartorii</i> (99.8)                       | -0.33 | 1.0E-02 | -2.97 | -2.96 | -2.62 | -2.56 | 1000097                                                                                                                                                                                                                                                                               | <i>Bacteroides_sartorii</i> _dnLKV3, <i>Bacteroides_chinchillae</i> _JCM_16497, <i>Bacteroides_sartorii</i> _A-C2-0, <i>Bacteroides_sartorii</i> _JCM_16497                                                                                                                                                      |
| 690 | <i>Eubacterium_ventriosum</i> (98)                                   | 0.32  | 1.4E-02 | -3.21 | -3.27 | -5.14 | -5.13 | 1000246                                                                                                                                                                                                                                                                               | <i>Eubacterium_ventriosum</i> _ATCC_27560                                                                                                                                                                                                                                                                        |
| 451 | <i>Clostridium_sp._ASF356</i> (93-94.8)                              | 0.33  | 1.0E-02 | -3.04 | -4.36 | -5.14 | -5.15 | 1000887; 1003995; 1004670; 1004357; 1001462; 1001939; 1005714; 1001326; 1000562; 1000842; 1000702; 1000654; 1000660; 1000508; 1000649; 1001463; 1001736; 1001717; 1004701; 1000911; 1005297; 1001347; 1001328; 1001565; 1000942; 1003772                                              | <i>Clostridium_sp._ASF356</i>                                                                                                                                                                                                                                                                                    |
| 314 | <i>Acetatifactor_muris</i> (95.5-97.4)                               | 0.35  | 6.7E-03 | -2.42 | -2.68 | -2.80 | -3.08 | 1008629; 1002103; 1006121; 1000764; 1010102; 1007804; 1006867; 1001554; 1007453; 1001935; 1006010; 1005964; 1001117; 1011087; 1001433; 1005638; 1000198; 1008313; 1009549; 1002851; 1002335; 1002604; 1004018; 1000351; 1000596; 1002680; 1004900; 1006785; 1000194; 1001179; 1003234 | <i>Acetatifactor_muris</i> , <i>Acetatifactor_muris</i> _CT-m2                                                                                                                                                                                                                                                   |
| 287 | <i>Bifidobacterium_pseudolongum/Actinobacteria_bacterium</i> (100)   | 0.35  | 5.5E-03 | -4.45 | -3.76 | -5.14 | -5.15 | 9726                                                                                                                                                                                                                                                                                  | <i>Bifidobacterium_pseudolongum</i> _PV8-2, <i>Actinobacteria_bacterium</i> _UC5.1-1B11, <i>Bifidobacterium_pseudolongum_globosum</i> _1549B, <i>Bifidobacterium_pseudolongum_globosum</i> _1747B, <i>Bifidobacterium_pseudolongum_globosum</i> _1734B                                                           |
| 429 | <i>Roseburia_sp._499</i> (96-97)                                     | 0.36  | 4.5E-03 | -2.94 | -3.12 | -3.15 | -3.69 | 1000437; 1008893; 1000231                                                                                                                                                                                                                                                             | <i>Roseburia_sp._499</i>                                                                                                                                                                                                                                                                                         |
| 291 | <i>Lachnospiraceae_bacterium_TWA4</i> (95.1-96)                      | 0.37  | 4.0E-03 | -2.51 | -2.73 | -2.70 | -3.33 | 1000505; 1010679; 1000453; 1002233; 1006654; 1000201; 1000221; 1000409; 1001291; 1000866                                                                                                                                                                                              | <i>Lachnospiraceae_bacterium</i> _TWA4                                                                                                                                                                                                                                                                           |
| 530 | <i>Erysipelothrix_larvae</i> (83.1-84.5)                             | 0.38  | 2.9E-03 | -3.70 | -3.54 | -5.14 | -5.14 | 1010694; 1011540; 1002468; 1000408; 1011283; 1000627                                                                                                                                                                                                                                  | <i>Erysipelothrix_larvae</i> _LV19                                                                                                                                                                                                                                                                               |
| 435 | <i>Anaerotruncus_colihominis/Clostridiales_bacterium</i> (91.5-92.7) | 0.38  | 2.8E-03 | -3.46 | -3.56 | -5.14 | -5.15 | 1000560; 1005372; 1000521; 1001793; 1011867                                                                                                                                                                                                                                           | <i>Anaerotruncus_colihominis</i> _DSM_17241, <i>Clostridiales_bacterium</i> _VE202-13, <i>Anaerotruncus_colihominis</i> _2789STDY5834939, <i>Anaerotruncus_colihominis</i> _An251, <i>Anaerotruncus_colihominis</i> _An175, <i>Anaerotruncus_colihominis</i> _An174, <i>Anaerotruncus_colihominis</i> _WAL_14565 |
| 233 | <i>Lachnospiraceae_bacterium_A2</i> (95.3-97.2)                      | 0.38  | 2.7E-03 | -2.45 | -2.56 | -2.66 | -2.93 | 1010501; 1002399; 1002708; 1003024; 1007329; 1000092; 1007401; 1000325; 1000668; 1002879; 1004035; 1005670; 1006234; 1006628; 1004677; 1003081; 1005500; 1010741; 1011419; 1005469                                                                                                    | <i>Lachnospiraceae_bacterium</i> _A2                                                                                                                                                                                                                                                                             |
| 266 | <i>Lachnospiraceae_bacterium/Roseburia_sp</i> (93.5)                 | 0.38  | 2.6E-03 | -3.25 | -3.31 | -5.14 | -5.14 | 1000322                                                                                                                                                                                                                                                                               | <i>Lachnospiraceae_bacterium</i> _3-1, <i>Roseburia_sp._499</i>                                                                                                                                                                                                                                                  |
| 56  | <i>Lachnospiraceae_bacterium_A4</i> (98.4-99.8)                      | 0.38  | 2.6E-03 | -1.92 | -2.10 | -2.78 | -2.59 | 1003987; 1000033                                                                                                                                                                                                                                                                      | <i>Lachnospiraceae_bacterium</i> _A4                                                                                                                                                                                                                                                                             |
| 549 | <i>Eggerthella_sp._YY7918</i> (93)                                   | 0.38  | 2.4E-03 | -4.25 | -3.97 | -5.14 | -5.15 | 1000605                                                                                                                                                                                                                                                                               | <i>Eggerthella_sp._YY7918</i>                                                                                                                                                                                                                                                                                    |
| 184 | <i>Bifidobacterium_pseudolongum</i> (100)                            | 0.39  | 2.1E-03 | -3.29 | -3.02 | -3.79 | -3.76 | 7625                                                                                                                                                                                                                                                                                  | <i>Bifidobacterium_pseudolongum</i> _UMB-MBP-01                                                                                                                                                                                                                                                                  |
| 253 | <i>Lachnospiraceae_bacterium/Clostridium_sp</i> (96.5-96.8)          | 0.39  | 1.9E-03 | -1.45 | -1.61 | -2.33 | -2.06 | 1000020; 1000021                                                                                                                                                                                                                                                                      | <i>Lachnospiraceae_bacterium</i> _A4, <i>Clostridium_sp._KNHs209</i>                                                                                                                                                                                                                                             |
| 245 | <i>Neglecta_sp</i> (97.8)                                            | 0.40  | 1.4E-03 | -2.63 | -2.68 | -3.13 | -5.13 | 1000126                                                                                                                                                                                                                                                                               | <i>Neglecta_timonensis</i> _SN17, <i>Neglecta_sp._Marseille-P3890</i>                                                                                                                                                                                                                                            |
| 743 | <i>Acetatifactor_muris/Clostridium_sp</i> (95.3)                     | 0.41  | 1.1E-03 | -3.95 | -3.86 | -5.14 | -5.15 | 1000468                                                                                                                                                                                                                                                                               | <i>Clostridium_sp._KNHs209</i> , <i>Acetatifactor_muris</i> , <i>Acetatifactor_muris</i> _CT-m2                                                                                                                                                                                                                  |
| 354 | <i>Intestinimonas_massiliensis</i> (95.1-96.1)                       | 0.44  | 4.9E-04 | -3.08 | -3.19 | -4.23 | -5.14 | 1011774; 1000245                                                                                                                                                                                                                                                                      | <i>Intestinimonas_massiliensis</i> _GD2                                                                                                                                                                                                                                                                          |
| 155 | <i>Eubacterium_plexicaudatum</i> (98.8)                              | 0.44  | 4.6E-04 | -2.63 | -2.87 | -2.90 | -3.13 | 1000083                                                                                                                                                                                                                                                                               | <i>Eubacterium_plexicaudatum</i> _ASF492                                                                                                                                                                                                                                                                         |
| 453 | <i>Clostridium_sp._ASF356</i> (98.3-99.8)                            | 0.45  | 3.5E-04 | -2.68 | -2.67 | -2.87 | -2.93 | 1000163; 1000376; 1000274; 1000388                                                                                                                                                                                                                                                    | <i>Clostridium_sp._ASF356</i>                                                                                                                                                                                                                                                                                    |
| 528 | <i>Desulforegula_conservatrix</i> (80.1)                             | 0.47  | 1.3E-04 | -3.81 | -3.77 | -5.14 | -5.15 | 1000476; 1009965                                                                                                                                                                                                                                                                      | <i>Desulforegula_conservatrix</i> _Mb1Pa                                                                                                                                                                                                                                                                         |

|     |                                                                 |      |         |       |       |       |       |                                                                                                                                                                                                                                                                                                                                                                                                                                                                                                                                                                                                                                                               |                                                                                                                                                                                                                                                    |
|-----|-----------------------------------------------------------------|------|---------|-------|-------|-------|-------|---------------------------------------------------------------------------------------------------------------------------------------------------------------------------------------------------------------------------------------------------------------------------------------------------------------------------------------------------------------------------------------------------------------------------------------------------------------------------------------------------------------------------------------------------------------------------------------------------------------------------------------------------------------|----------------------------------------------------------------------------------------------------------------------------------------------------------------------------------------------------------------------------------------------------|
| 116 | Clostridium_populeti (93.6-95.5)                                | 0.48 | 1.1E-04 | -2.56 | -1.92 | -3.77 | -5.13 | 1007464; 1008552; 1002159; 1000968; 1000096; 1010727; 1003066; 1000098; 1007217; 1001569; 1000564; 1003779; 1000055; 1000438; 1002461; 1002670; 1004514; 1000446; 1003172; 1001893; 1000509; 1000428                                                                                                                                                                                                                                                                                                                                                                                                                                                          | Clostridium_populeti_743A                                                                                                                                                                                                                          |
| 153 | Eubacterium_plexicaudatum (93.2-95.1)                           | 0.50 | 5.2E-05 | -1.93 | -1.97 | -2.74 | -2.52 | 1004104; 1000029; 1000209; 1000378; 1000903; 1002068; 1008650; 1003766; 1003967; 1006687; 1007582; 1003350; 1009582; 1001283; 1002382; 1004060; 1001070; 1002919; 1002962; 1003887; 1005818; 1001077; 1004334; 1005821; 1004681; 1007313; 1006597; 1005007; 1005599; 1004385; 1004391; 1006523; 1004899; 1003569; 1004779; 1003791; 1001860; 1002089; 1002191; 1010826; 1001302; 1003570; 1008811; 1001053; 1003705; 1003055; 1006356; 1003794; 1000985; 1001164; 1000176; 1002675; 1006311; 1001089; 1003727; 1002522; 1007531; 1003617; 1001932; 1003358; 1000856; 1005846; 1008928; 1001631; 1001208; 1007092; 1001538; 1008605; 1008178; 1000916; 1000920 | Eubacterium_plexicaudatum_ASF_492                                                                                                                                                                                                                  |
| 308 | Lachnospiraceae_bacterium/Dorea_sp (98.8-99)                    | 0.51 | 3.1E-05 | -2.92 | -2.89 | -5.13 | -5.14 | 1000419; 1000218                                                                                                                                                                                                                                                                                                                                                                                                                                                                                                                                                                                                                                              | Dorea_sp_5-2,Lachnospiraceae_bacterium_3-2                                                                                                                                                                                                         |
| 117 | Clostridium_populeti (95.8-96.5)                                | 0.52 | 1.8E-05 | -3.00 | -2.47 | -3.44 | -3.83 | 1000498; 1000101; 1000405; 1002850; 1000931                                                                                                                                                                                                                                                                                                                                                                                                                                                                                                                                                                                                                   | Clostridium_populeti_743A                                                                                                                                                                                                                          |
| 224 | Eubacterium_ramulus (94.6-96.5)                                 | 0.57 | 2.5E-06 | -2.56 | -2.61 | -3.19 | -3.39 | 1005026; 1000102                                                                                                                                                                                                                                                                                                                                                                                                                                                                                                                                                                                                                                              | Eubacterium_ramulus_ATCC_29099,Eubacterium_ramulus_2789S TDY5608891                                                                                                                                                                                |
| 480 | Clostridium_xylanolyticum/Bacteroides_xylanolyticus (95.3-96.3) | 0.58 | 1.3E-06 | -2.76 | -3.01 | -5.13 | -5.14 | 1010154; 1000193                                                                                                                                                                                                                                                                                                                                                                                                                                                                                                                                                                                                                                              | Clostridium_sp._12(A),Clostridium_xylanolyticum_DSM_6555,Bacteroides_xylanolyticus_X5-1                                                                                                                                                            |
| 436 | Anaerotruncus_colihominis/Clostridiales_bacterium (93.8-95.8)   | 0.58 | 1.1E-06 | -2.95 | -2.77 | -3.18 | -3.38 | 1001009; 1008169; 1000243; 1000251                                                                                                                                                                                                                                                                                                                                                                                                                                                                                                                                                                                                                            | Anaerotruncus_colihominis_DSM_17241,Clostridiales_bacterium_VE202-13,Anaerotruncus_colihominis_2789STDY5834939,Anaerotruncus_colihominis_An251,Anaerotruncus_colihominis_An175,Anaerotruncus_colihominis_An174,Anaerotruncus_colihominis_WAL_14565 |

**Supplementary Table 2.** Species for the bacterial cocktail were as follows:

| <b>Species name</b>                     | <b>Source</b> | <b>Catalog number</b> |
|-----------------------------------------|---------------|-----------------------|
| <i>Alistipes finegoldii</i>             | DSMZ          | 17242                 |
| <i>Alistipes putredinis</i>             | ATCC          | 29800                 |
| <i>Bacteroides massiliensis</i>         | DSMZ          | 17679                 |
| <i>Bacteroides rodentium</i>            | DSMZ          | 26882                 |
| <i>Bacteroides sartorii</i>             | DSMZ          | 21941                 |
| <i>Clostridium clostridioforme</i>      | ATCC          | 25537                 |
| <i>Clostridium methylpentosum</i>       | ATCC          | 43829                 |
| <i>Lactobacillus animalis</i>           | ATCC          | 35046                 |
| <i>Lactobacillus murinus</i>            | ATCC          | 35020                 |
| <i>Muribaculum intestinale</i>          | DSMZ          | 28989                 |
| <i>Oscillibacter valericigenes</i>      | DSMZ          | 18026                 |
| <i>Parasutterella excrementihominis</i> | DSMZ          | 21040                 |

**Supplementary Table 3.** Patient characteristics of MGH/Dana-Farber/Harvard Cancer Center (USA) cohort.

| Patient | Sex | Age | Response | Therapy                          | Progression-free Survival (days) | Overall Survival (days) |
|---------|-----|-----|----------|----------------------------------|----------------------------------|-------------------------|
| 1       | F   | 45  | R        | NIVO+aKIR                        | 1317                             | 1317                    |
| 2       | F   | 63  | R        | IPI+NIVO                         | 776                              | 776                     |
| 3       | M   | 74  | R        | pembro                           | 57                               | 470                     |
| 4       | M   | 48  | NR       | IPI                              | 81                               | 1075                    |
| 5       | M   | 80  | NR       | NIVO                             | 80                               | 476                     |
| 6       | F   | 78  | R        | pembro                           | 555                              | 789                     |
| 7       | F   | 67  | NR       | pembro (prior vem+cobi)          | 58                               | 714                     |
| 8       | M   | 67  | NR       | IPI+NIVO                         | 324                              | 599                     |
| 9       | M   | 70  | NR       | pembro                           | 74                               | 345                     |
| 10      | M   | 78  | NR       | pembro                           | 182                              | 548                     |
| 11      | F   | 69  | NR       | pembro                           | 147                              | 895                     |
| 12      | M   | 65  | NR       | pembro                           | 81                               | 144                     |
| 13      | M   | 74  | NR       | pembro                           | 103                              | 354                     |
| 14      | M   | 28  | R        | IPI+NIVO                         | 789                              | 789                     |
| 15      | M   | 77  | NR       | pembro                           | 474                              | 783                     |
| 16      | M   | 65  | R        | pembro                           | 624                              | 624                     |
| 17      | F   | 54  | R        | ipi+nivo+GM-CSF                  | 578                              | 578                     |
| 18      | M   | 73  | R        | IPI+NIVO                         | 592                              | 592                     |
| 19      | M   | 52  | R        | IPI+NIVO                         | 264                              | 264                     |
| 20      | M   | 77  | R        | pembro                           | 571                              | 571                     |
| 21      | M   | 75  | R        | pembro                           | 404                              | 404                     |
| 22      | F   | 58  | NR       | IPI+NIVO                         | 78                               | 183                     |
| 23      | M   | 53  | R        | pembro (adjuvant)                | 326                              | 326                     |
| 24      | F   | 70  | NR       | pembro                           | 103                              | 354                     |
| 25      | F   | 67  | NR       | IPI+NIVO                         | 76                               | 313                     |
| 26      | M   | 75  | NR       | pembro+epacadostat               | 212                              | 326                     |
| 27      | M   | 82  | NR       | IPI+NIVO                         | 15                               | 15                      |
| 28      | M   | 71  | NR       | pembro+entinostat (prior pembro) | 74                               | 232                     |
| 29      | F   | 54  | R        | pembro (adjuvant)                | 144                              | 144                     |
| 30      | F   | 54  | R        | IPI+NIVO (adjuvant)              | 140                              | 140                     |
| 31      | F   | 57  | NR       | IPI+NIVO                         | 76                               | 187                     |
| 32      | M   | 70  | R        | IPI+NIVO                         | 210                              | 210                     |
| 33      | F   | 70  | R        | IPI+NIVO                         | 204                              | 204                     |
| 34      | F   | 69  | R        | pembro (adjuvant)                | 74                               | 74                      |
| 35      | M   | 73  | R        | IPI+NIVO                         | 89                               | 89                      |
| 36      | M   | 59  | R        | IPI+NIVO                         | 109                              | 109                     |
| 37      | F   | 72  | NR       | pembro                           | 49                               | 86                      |
| 38      | M   | 71  | R        | IPI (prior NIVO)                 | 1071                             | 1391                    |
| 39      | M   | 61  | NR       | IPI                              | 32                               | 45                      |
| 40      | M   | 55  | R        | aPD1                             | 1861                             | 1861                    |

**Supplementary Table 4.** Patient characteristics of Zurich Hospital (Switzerland) cohort.

| <b>Patient</b> | <b>Sex</b> | <b>Age</b> | <b>Response to Ipilimumab</b> |
|----------------|------------|------------|-------------------------------|
| 1              | F          | 47         | R                             |
| 2              | M          | 77         | NR                            |
| 3              | M          | 54         | NR                            |
| 4              | M          | 72         | R                             |
| 5              | F          | 44         | R                             |
| 6              | M          | 72         | NR                            |
| 7              | M          | 48         | NR                            |
| 8              | M          | 56         | NR                            |
| 9              | F          | 54         | NR                            |
| 10             | M          | 69         | R                             |
| 11             | M          | 57         | R                             |
| 12             | F          | 47         | R                             |
| 13             | F          | 66         | NR                            |
| 14             | M          | 34         | NR                            |
| 15             | M          | 73         | NR                            |
| 16             | F          | 36         | R                             |
| 17             | F          | 67         | NR                            |
| 18             | F          | 65         | NR                            |
| 19             | M          | 59         | R                             |
| 20             | F          | 59         | NR                            |
| 21             | F          | 73         | NR                            |
| 22             | M          | 46         | NR                            |
| 23             | M          | 51         | NR                            |
| 24             | F          | 69         | R                             |
| 25             | F          | 54         | NR                            |

**Supplementary Table 5.** Patient characteristics of Rambam Health Care Center (Israel) cohort.

| <b>Patient</b> | <b>Sex</b> | <b>Year of Birth</b> | <b>Response to Nivolumab/Pembrolizumab</b> | <b>Disease-free Survival(months)</b> | <b>Overall Survival(months)</b> |
|----------------|------------|----------------------|--------------------------------------------|--------------------------------------|---------------------------------|
| 1              | M          | 1958                 | NR                                         | 4                                    | 9                               |
| 2              | M          | 1941                 | R                                          | 23                                   | 28                              |
| 3              | M          | 1931                 | R                                          | 21                                   | 21                              |
| 4              | F          | 1956                 | R                                          | 13                                   | 21                              |
| 5              | M          | 1963                 | R                                          | 28                                   | 28                              |
| 6              | M          | 1931                 | NR                                         | 8                                    | 10                              |
| 7              | M          | 1934                 | R                                          | 12                                   | 12                              |
| 8              | M          | 1922                 | NR                                         | 3                                    | 4                               |
| 9              | M          | 1942                 | NR                                         | 4                                    | 8                               |
| 10             | F          | 1951                 | NR                                         | 6                                    | 13                              |
| 11             | M          | 1938                 | R                                          | 19                                   | 19                              |
| 12             | M          | 1940                 | R                                          | 39                                   | 39                              |
| 13             | F          | 1950                 | R                                          | 29                                   | 29                              |
| 14             | F          | 1963                 | R                                          | 23                                   | 23                              |
| 15             | F          | 1953                 | R                                          | 35                                   | 37                              |
| 16             | F          | 1939                 | R                                          | 36                                   | 36                              |
| 17             | F          | 1951                 | NR                                         | 4                                    | 16                              |
| 18             | M          | 1947                 | NR                                         | 3                                    | 5                               |
| 19             | M          | 1963                 | NR                                         | 3                                    | 8                               |
| 20             | M          | 1936                 | NR                                         | 5                                    | 25                              |
| 21             | M          | 1953                 | NR                                         | 2                                    | 7                               |

**Supplementary Table 6. Primers for qRT-PCR analyses were as follows**

| Gene              | Forward (5'-3')         | Reverse (5'-3')         |
|-------------------|-------------------------|-------------------------|
| <b>Mouse</b>      |                         |                         |
| CCL2              | TAAAAACCTGGATCGGAACCAA  | GCATTAGCTTCAGATTTACGGGT |
| CCL4              | TTCTGCTGTTTCTCTTACACCT  | CTGTCTGCCTCTTTTGGTCAG   |
| CCL5              | GCTGCTTGCCTACCTCTCC     | TCGAGTGACAAACACGACTGC   |
| CCL8              | TCTACGCAGTGCTTCTTTGCC   | AAGGGGGATCTTCAGCTTTAGTA |
| TLR4              | ATGGCATGGCTTACACCACC    | GAGGCCAATTTTGTCTCCACA   |
| TLR7              | ATGTGGACACGGAAGAGACAA   | GGTAAGGGTAAGATTGGTGGTG  |
| TLR9              | ATGGTTCTCCGTCGAAGGACT   | GAGGCTTCAGCTCACAGGG     |
| CD80              | ACCCCAACATAACTGAGTCT    | TTCCAACCAAGAGAAGCGAGG   |
| CD86              | TGTTCCGTGGAGACGCAAG     | TTGAGCCTTTGTAATGGGCA    |
| CD40              | GCTGTGAGGATAAGAATTGGAG  | CTGGTTCGACAGGGCTGAA     |
| Stat1             | CGGAGTCGGAGGCCCTAAT     | ACAGCAGGTGCTTCTTAATGAG  |
| ICOS1             | ATGAAGCCGTACTTCTGCCG    | CGCATTTTTAACTGCTGGACAG  |
| KLRC1             | GCCCCTGCAAAGGTTTTCC     | TCTGTGGGTCTAGTCATTGAGG  |
| KLRD1             | TCTAGGATCACTCGGTGGAGA   | CACTTGTCCAGGCAAACACAG   |
| sXBP1             | CTGAGTCCGAATCAGGTGCAG   | GTCCATGGGAAGATGTTCTGG   |
| IFN- $\alpha$     | TGCCAGCAGATCAAGAAGG     | TCAGGGGAAATTCCTGCACC    |
| IL-1 $\beta$      | GCAACTGTTCTGAACTCAACT   | ATCTTTTGGGGTCCGTCAACT   |
| TNF- $\alpha$     | CCCTCACACTCAGATCATCTTCT | GCTACGACGTGGGCTACAG     |
| IL-6              | TAGTCCTTCTACCCAATTTCC   | TTGGTCCTTAGCCACTCCTTC   |
| NLRP3             | ATTACCCGCCGAGAAAGG      | TCGCAGCAAAGATCCACACAG   |
| NLRP6             | CTCGCTTGCTAGTACTACAC    | AGTGCAAACAGCGTCTCGTT    |
| NOD2              | CAGGTCTCCGAGAGGGTACTG   | GCTACGGATGAGCCAAATGAAG  |
| XBP1              | AGCAGCAAGTGGTGAATTG     | GAGTTTTCTCCCGTAAAAGCTGA |
| ERdj4             | CTCCACAGTCAGTTTTCGTCTT  | GGCCTTTTTGATTTGTGCTC    |
| Agpat6            | AGCTTGATTGTCAACCTCTG    | CCGTTGGTGTAGGGCTTGT     |
| Fasn              | GGAGGTGGTGATAGCCGGTAT   | TGGGTAATCCATAGAGCCAG    |
| SCD2              | GCATTTGGGAGCCTTGACG     | AGCCGTGCCTTGATGTTCTG    |
| Lpar1             | GCTTCTACAATGAGTCTATCGCC | TGATGAACACGCAAACAGTGAT  |
| CHOP              | CTGGAAGCCTGGTATGAGGAT   | CAGGGTCAAGAGTAGTGAAGGT  |
| ATF4              | CCTGAACAGCGAAGTGTGG     | TGGAGAACCCATGAGGTTTCAA  |
| MMP7              | CTGCCACTGTCCCAGGAA      | GGGAGAGTTTTCCAGTCATGG   |
| Phospholipases A2 | CAGCACATTATAGTGGAACACCA | AGTGTCAGCATATCGCCAAA    |
| Angiogenin-4      | GGTTGTGATTCTCCAACCTCTG  | CTGAAGTTTTCTCCATAAGGGCT |
| RNF5              | AAGAATGCCCGGTGTGTAAG    | GCGGGGTGGAGTTTTCAATC    |
| 18S               | GTAACCCGTTGAACCCATT     | CCATCCAATCGGTAGTAGCG    |
| Tubb5             | GATCGGTGCTAAGTTCTGGGA   | AGGGACATACTTGCCACCTGT   |
| <b>Human</b>      |                         |                         |
| sXBP1             | CCGCAGCAGGTGCAGG        | GAGTCAATACCGCCAGAATCCA  |

|                                 |                          |                             |
|---------------------------------|--------------------------|-----------------------------|
| BIP                             | CATCACGCCGTCCTATGTCG     | CGTCAAAGACCGTGTTCTCG        |
| ATF4                            | CCCTTCACCTTCTTACAACCTC   | TGCCCAGCTCTAAACTAAAGGA      |
| <b>Bacteria</b>                 |                          |                             |
| <i>Bacteroides</i>              | GAGAGGAAGGTCCCCAC        | CGCTACTTGGCTGGTTCAG         |
| <i>Lactobacillus</i>            | GAGGCAGCAGTAGGGAATCTTC   | GGCCAGTTACTACCTCTATCCTTCTTC |
| <i>Alistipes finegoldii</i>     | GTACTAATTCCCCATAACATTGAG | CTAATACAACGCATGCCCATCTT     |
| V3-V4                           | CCTACGGGNGGCWGCAG        | GACTIONVGGGTATCTAATCC       |
| <i>Bacteroides massiliensis</i> | CAAGGCCTACAAACGCAGTG     | GCGGATGGTCCTCTTGGG          |



### Supplementary References

1. Fuentes, M.B., *et al.* Host type I IFN signals are required for antitumor CD8+ T cell responses through CD8{alpha}+ dendritic cells. *J Exp Med* **208**, 2005-2016 (2011).
